# Supplementary material for: Rapid determination of serum amyloid A using an upconversion luminescent lateral flow immunochromatographic strip
Source: Royal Society of Chemistry journal article supplement (doi:10.1039/d3an00482a), 2023-01-01
Supplement: d3an00482a1.pdf [file d3an00482a1.pdf]

## Upconversion fluorescent lateral flow immunochromatographic strip for rapid determination of serum amyloid A

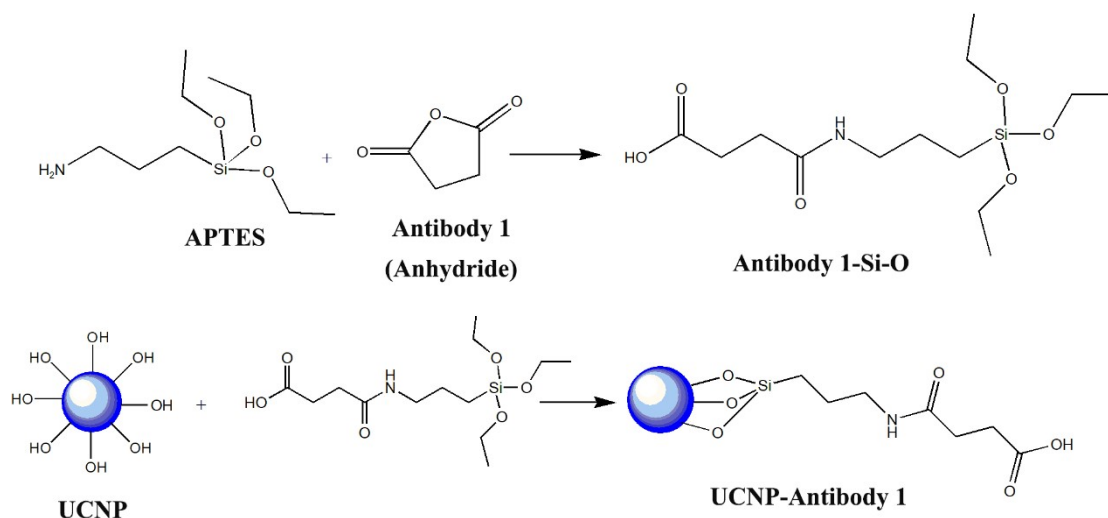

**Figure. S1** The coupling principle of carboxy modified fluorescent microspheres and antibodies

### Activation of luminescent nanoparticles

Take 1 mg of UCNP and add them to the EP tube. Centrifuge for 20 minutes (15000 rpm) to remove the supernatant. Add 1 ml buffer solution (borax solution: pH = 8.5), ultrasonic dispersion (ice bath ultrasound twice, 1 s/time, 5 s interval each time). Then 1 mg EDAC (1-(3-dimethylaminopropyl)-3-ethylcarbodiimide hydrochloride), 1 mg sulfo-NHS (N-hydroxysuccinimide) and 200  $\mu$ l deionized water were added to UCNP, and the mixture of UCNP was placed on a rotating wheel and incubated at room temperature for 1 h. Centrifugation for 20 minutes (15000 rpm), removal of supernatant and addition of 1 ml buffer, ultrasonic dispersion and standby.

### Coupling

The ratio of UCNP to mAb was 8:1. The mixture was then placed on a rotating pusher, incubated at room temperature for 4 hours, centrifuged for 20 minutes (15000 rpm). After the supernatant was removed, 1 ml buffer was added, and then 200  $\mu$ l ethanolamine was added after ultrasonic dispersion. The mixture of UCNP-mAb was placed on a rotating wheel and incubated at room temperature for 1 hour. Centrifugation for 20 minutes (15000 rpm) to remove supernatant. Then add 1 ml of sealing solution (borax-Casin) and disperse by ultrasound. Finally, the mixture of UCNP-mAb was placed on a rotating wheel and incubated at room temperature for 12 hours. Centrifugation for 20 min (15000 rpm) to remove supernatant. Add 1 ml buffer and disperse by ultrasound.

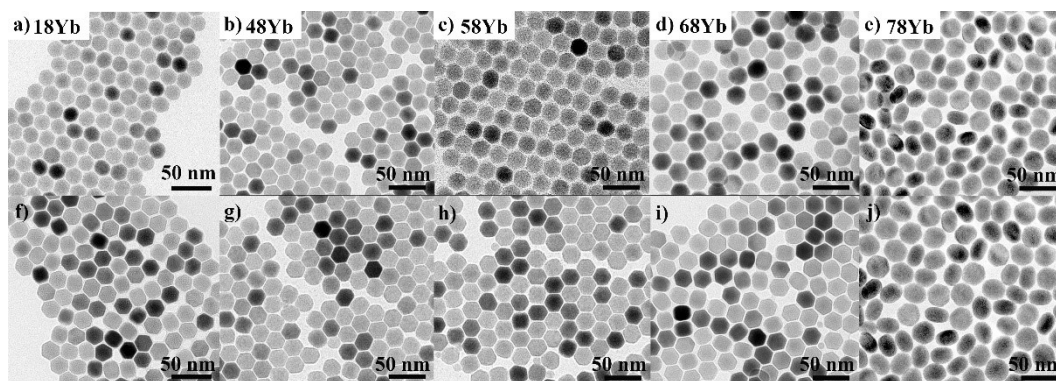

**Figure. S2** TEM images of the (a-e)  $\text{NaYF}_4: x\% \text{Yb}/8\% \text{Er}$  ( $x=18, 48, 58, 68$  and  $78$ ) and (f-j)  $\text{NaYF}_4: x\% \text{Yb}/8\% \text{Er} @ \text{NaYF}_4$  nanoparticles.

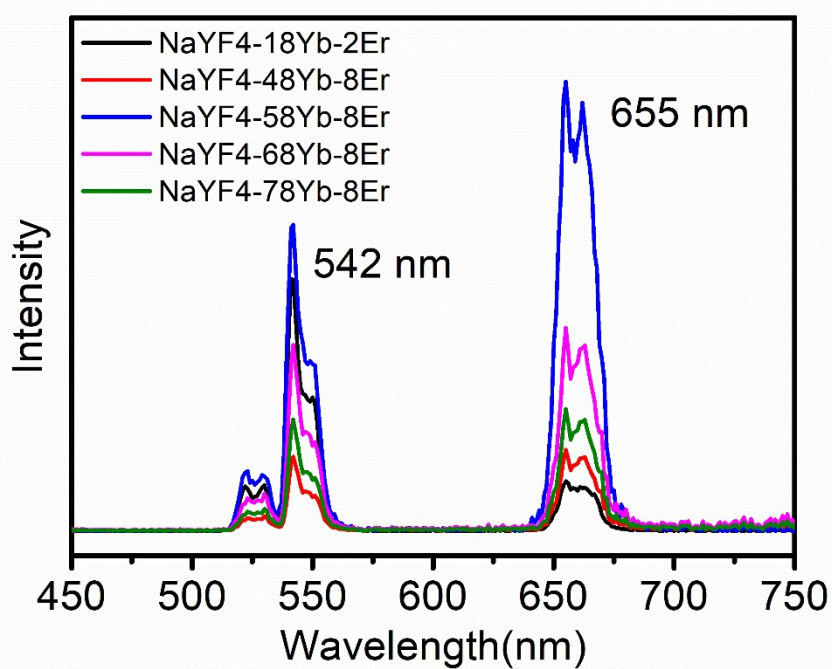

**Figure. S3** Emission spectra of the  $\text{NaYF}_4: 18\% \text{Yb}/2\% \text{Er}$  and the  $\text{NaYF}_4: x\% \text{Yb}/8\% \text{Er}$  ( $x= 48, 58, 68$  and  $78$ ) nanoparticles.

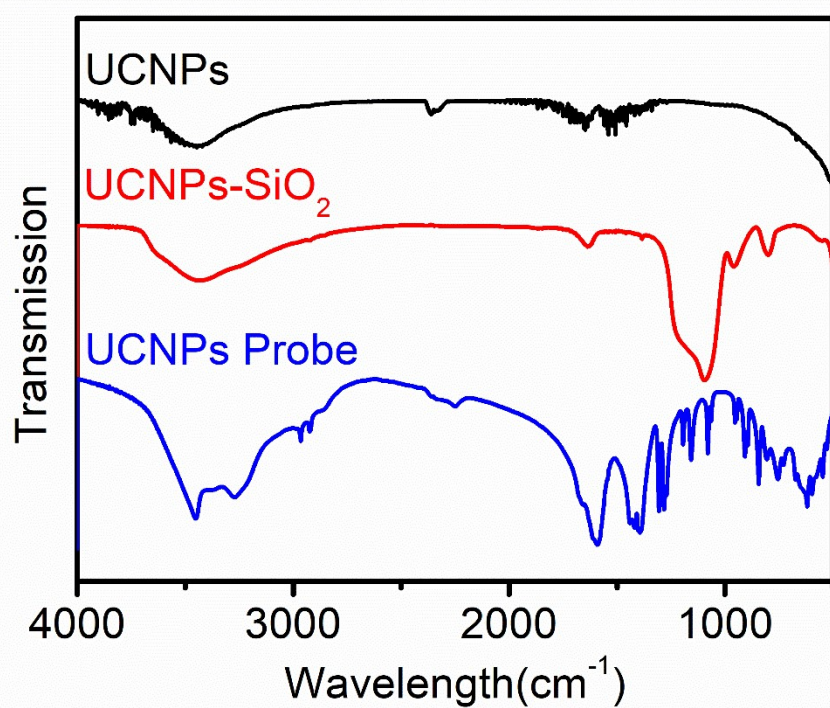

**Figure. S4** FTIR spectrum of NaYF<sub>4</sub>: Yb, Er UCNPs, UCNPs-SiO<sub>2</sub> and UCNPs Probe.

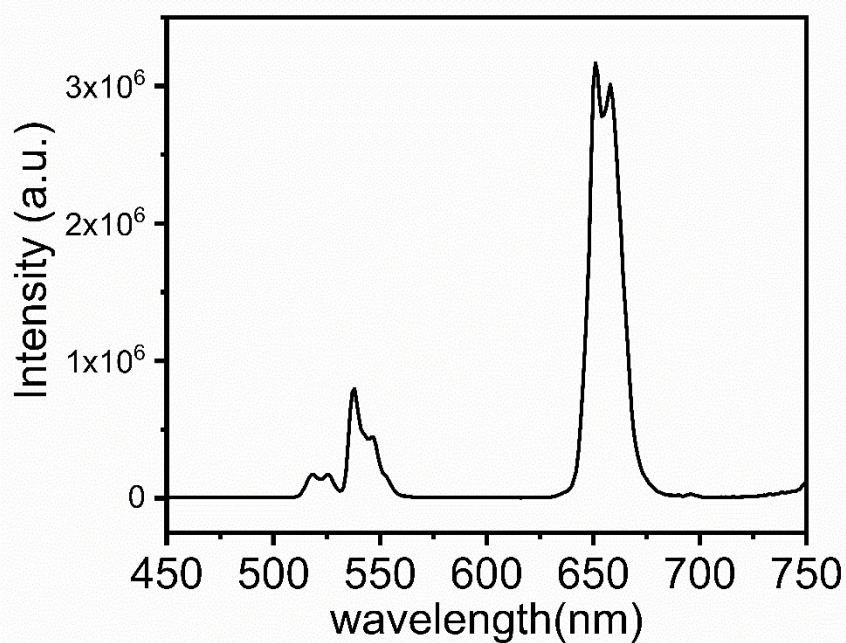

**Figure. S5** Emission spectra of test lines of LFIS after 120 days.

**Table 1** Experiment design for the preparation of UCNPs@SiO<sub>2</sub> core shell particle using cyclohexane as reaction solvent

| Batch | NH <sub>4</sub> OH (ml) | UCNPs<br>(mmol·L <sup>-1</sup> ) | TEOS (ml) | Igepal CO520<br>(ml) |
|-------|-------------------------|----------------------------------|-----------|----------------------|
| A     | 0.08                    | 0.01                             | 0.02      | 0.2                  |
| B     | 0.08                    | 0.01                             | 0.04      | 0.2                  |
| C     | 0.08                    | 0.01                             | 0.04      | 0.5                  |
| D     | 0.08                    | 0.01                             | 0.06      | 0.5                  |

Table S2. Characteristics of the UCNP-LFIS compared with other reported CVD detection methods.

| Detection method     | Target | Detection limit | Total time | Reference |
|----------------------|--------|-----------------|------------|-----------|
| Protein microarrays  | SAA    | 5.9 ng/mL       | >2.5 h     | [1]       |
| Antibody microarrays | SAA    | 0.9 µg/ml       | >2.5 h     | [1]       |
| CG-LFIS              | CPR    | 1 µg/ml         | 15 min     | [2]       |
| UCNP-LFIS            | SAA    | 0.1 µg/ml       | 15 min     | This work |

#### References

- [1] O. Gul, E. Calay, U. Sezerman, H. Basaga, Y. Gurbuz. *Sens. Actuators B-Chem.*, 2007, **125**, 581-588.
- [2] W. Leung, C. P. Chan, M. Leung, K. Lehmann, I. Renneberg, M. Lehmann, A. Hempel, J. F. C. Glatz, R. Renneberg. *Analytical Letters*, 2005, 38, 423-439.
